# Supplementary material for: Fullerene-based 0D ferroelectrics/multiferroics for ultrahigh-density and ultrafast nonvolatile memories
Source: Royal Society of Chemistry journal article supplement (doi:10.1039/d0cp01797c), 2020-01-01
Supplement: d0cp01797c1.pdf [file d0cp01797c1.pdf]

# Supporting Information

## Fullerene-Based 0D Ferroelectrics/Multiferroics for Ultrahigh-Density and Ultrafast Nonvolatile Memories

Tingting Zhong, Menghao Wu\*

School of Physics, Huazhong University of Science and Technology, Wuhan, Hubei, China 430074

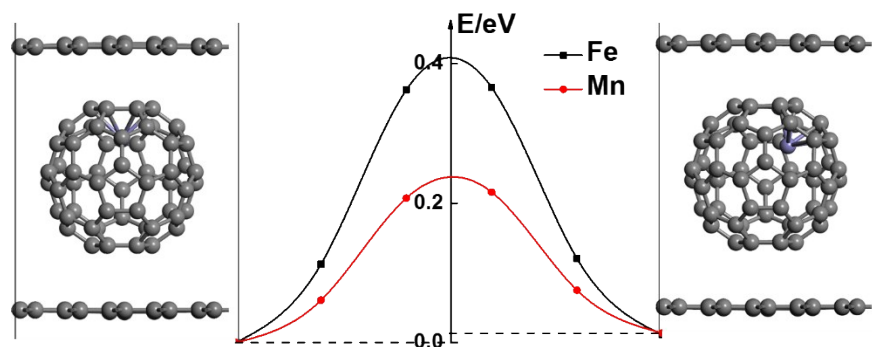

Figure S1. The energy profiles of M diffusion pathway for  $M@C_{60}$  intercalated between two graphene layers.

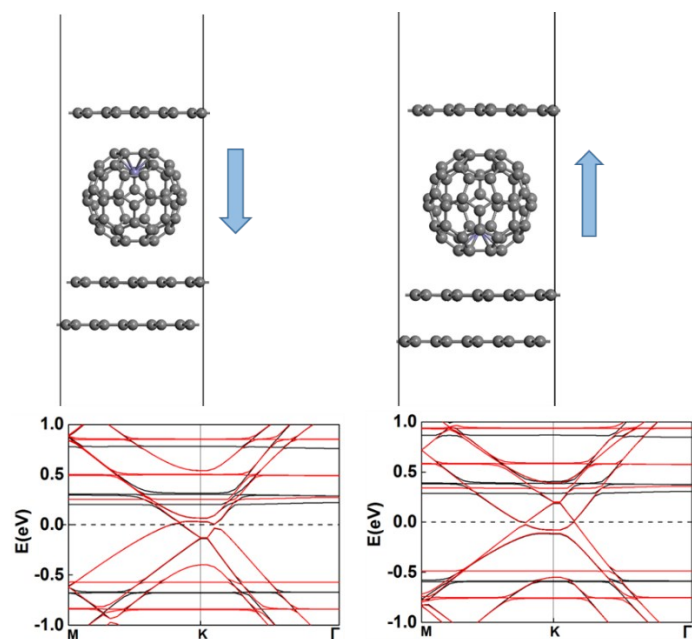

Figure S2. Device design based on  $Fe@C_{60}$  intercalated between two graphene layers.

Table S1. Fitted parameters  $A_0$ - $A_8$  in Eq.(1).

|       |                                                |
|-------|------------------------------------------------|
| $A_0$ | <b><math>-6.48075465 \times 10^{-4}</math></b> |
| $A_1$ | <b><math>-1.22701926 \times 10^1</math></b>    |
| $A_2$ | <b><math>-3.68193810 \times 10^2</math></b>    |
| $A_3$ | <b><math>1.25854840 \times 10^5</math></b>     |
| $A_4$ | <b><math>-6.52326964 \times 10^6</math></b>    |
| $A_5$ | <b><math>1.50232429 \times 10^8</math></b>     |
| $A_6$ | <b><math>-1.77316562 \times 10^9</math></b>    |
| $A_7$ | <b><math>1.04990417 \times 10^{10}</math></b>  |
| $A_8$ | <b><math>-2.47745609 \times 10^{10}</math></b> |
